# Supplementary material for: Hepatic sarcoidosis: Clinical characteristics and outcome
Source: PubMed Central journal article supplement — JHEP Rep. 2021 Sep 3;3(6):100360. doi: 10.1016/j.jhepr.2021.100360 (PMC8571721; doi:10.1016/j.jhepr.2021.100360), 2021-09-03
Supplement: mmc1.pdf [file mmc1.pdf]

## Journal of Hepatology

### CTAT methods

Tables for a “Complete, Transparent, Accurate and Timely account” (CTAT) are now mandatory for all revised submissions. The aim is to enhance the reproducibility of methods.

- Only include the parts relevant to your study
- Refer to the CTAT in the main text as ‘Supplementary CTAT Table’
- Do not add subheadings
- Add as many rows as needed to include all information
- Only include one item per row

**If the CTAT form is not relevant to your study, please outline the reasons why:**

|  |
|--|
|  |
|--|

#### 1.1 Antibodies

| Name | Citation | Supplier | Cat no. | Clone no. |
|------|----------|----------|---------|-----------|
|      |          |          |         |           |

#### 1.2 Cell lines

| Name | Citation | Supplier | Cat no. | Passage no. | Authentication test method |
|------|----------|----------|---------|-------------|----------------------------|
|      |          |          |         |             |                            |

#### 1.3 Organisms

| Name | Citation | Supplier | Strain | Sex | Age | Overall n number |
|------|----------|----------|--------|-----|-----|------------------|
|      |          |          |        |     |     |                  |

#### 1.4 Sequence based reagents

| Name | Sequence | Supplier |
|------|----------|----------|
|      |          |          |

#### 1.5 Biological samples

| Description | Source | Identifier |
|-------------|--------|------------|
|             |        |            |

#### 1.6 Deposited data

| Name of repository | Identifier | Link |
|--------------------|------------|------|
|                    |            |      |

## 1.7 Software

| Software name                         | Manufacturer              | Version   |
|---------------------------------------|---------------------------|-----------|
| IBM SPSS statistical software package | SPSS/IBM, Munich, Germany | SPSS 26.0 |

## 1.8 Other (e.g. drugs, proteins, vectors etc.)

|  |  |  |
|--|--|--|
|  |  |  |
|  |  |  |

## 1.9 Please provide the details of the corresponding methods author for the manuscript:

Dr. Christiana Graf, MD  
Medizinische Klinik 1  
Universitätsklinikum Frankfurt am Main  
Theodor-Stern-Kai 7  
60590 Frankfurt am Main, Germany  
Tel: +4969-6301-5122  
Fax: +4969-6301-83112  
Email: [christiana.graf@kgu.de](mailto:christiana.graf@kgu.de)

## 2.0 Please confirm for randomised controlled trials all versions of the clinical protocol are included in the submission. These will be published online as supplementary information.

|  |
|--|
|  |
|--|
