# Supplementary material for: Hepatic sarcoidosis: Clinical characteristics and outcome
Source: PubMed Central journal article supplement — JHEP Rep. 2021 Sep 3;3(6):100360. doi: 10.1016/j.jhepr.2021.100360 (PMC8571721; doi:10.1016/j.jhepr.2021.100360), 2021-09-03
Supplement: mmc2.pdf [file mmc2.pdf]

## ICMJE DISCLOSURE FORM

Date: August 7<sup>th</sup>, 2021

Your Name: Dr. Christiana Graf

Manuscript Title: Hepatic Sarcoidosis: Clinical Characteristics and Outcome

Manuscript number (if known): JHEPR-D-21-00154R1

In the interest of transparency, we ask you to disclose all relationships/activities/interests listed below that are related to the content of your manuscript. "Related" means any relation with for-profit or not-for-profit third parties whose interests may be affected by the content of the manuscript. Disclosure represents a commitment to transparency and does not necessarily indicate a bias. If you are in doubt about whether to list a relationship/activity/interest, it is preferable that you do so.

The following questions apply to the author's relationships/activities/interests as they relate to the current manuscript only.

The author's relationships/activities/interests should be defined broadly. For example, if your manuscript pertains to the epidemiology of hypertension, you should declare all relationships with manufacturers of antihypertensive medication, even if that medication is not mentioned in the manuscript.

In item #1 below, report all support for the work reported in this manuscript without time limit. For all other items, the time frame for disclosure is the past 36 months.

|                                                           |                                                                                                                                                                                | Name all entities with whom you have this relationship or indicate none (add rows as needed) | Specifications/Comments (e.g., if payments were made to you or to your institution) |
|-----------------------------------------------------------|--------------------------------------------------------------------------------------------------------------------------------------------------------------------------------|----------------------------------------------------------------------------------------------|-------------------------------------------------------------------------------------|
| <b>Time frame: Since the initial planning of the work</b> |                                                                                                                                                                                |                                                                                              |                                                                                     |
| 1                                                         | All support for the present manuscript (e.g., funding, provision of study materials, medical writing, article processing charges, etc.)<br><b>No time limit for this item.</b> | None                                                                                         | None                                                                                |
|                                                           |                                                                                                                                                                                |                                                                                              |                                                                                     |
|                                                           |                                                                                                                                                                                |                                                                                              |                                                                                     |
|                                                           |                                                                                                                                                                                |                                                                                              |                                                                                     |
|                                                           |                                                                                                                                                                                |                                                                                              |                                                                                     |
|                                                           |                                                                                                                                                                                |                                                                                              |                                                                                     |
|                                                           |                                                                                                                                                                                |                                                                                              |                                                                                     |
| <b>Time frame: past 36 months</b>                         |                                                                                                                                                                                |                                                                                              |                                                                                     |
| 2                                                         | Grants or contracts from any entity (if not indicated in item #1 above).                                                                                                       | None                                                                                         | None                                                                                |
|                                                           |                                                                                                                                                                                |                                                                                              |                                                                                     |
| 3                                                         | Royalties or licenses                                                                                                                                                          | None                                                                                         | None                                                                                |
|                                                           |                                                                                                                                                                                |                                                                                              |                                                                                     |
| 4                                                         | Consulting fees                                                                                                                                                                | None                                                                                         | None                                                                                |

|    |                                                                                                              |                                                        |      |
|----|--------------------------------------------------------------------------------------------------------------|--------------------------------------------------------|------|
|    |                                                                                                              |                                                        |      |
|    |                                                                                                              |                                                        |      |
| 5  | Payment or honoraria for lectures, presentations, speakers bureaus, manuscript writing or educational events | Speaking fees from AbbVie outside the submitted work.  |      |
|    |                                                                                                              |                                                        |      |
| 6  | Payment for expert testimony                                                                                 | None                                                   | None |
|    |                                                                                                              |                                                        |      |
| 7  | Support for attending meetings and/or travel                                                                 | Travel support from Gilead outside the submitted work. |      |
|    |                                                                                                              |                                                        |      |
| 8  | Patents planned, issued or pending                                                                           | None                                                   | None |
|    |                                                                                                              |                                                        |      |
| 9  | Participation on a Data Safety Monitoring Board or Advisory Board                                            |                                                        | None |
|    |                                                                                                              |                                                        |      |
| 10 | Leadership or fiduciary role in other board, society, committee or advocacy group, paid or unpaid            | None                                                   | None |
|    |                                                                                                              |                                                        |      |
| 11 | Stock or stock options                                                                                       | None                                                   | None |
|    |                                                                                                              |                                                        |      |
| 12 | Receipt of equipment, materials, drugs, medical writing, gifts or other services                             | None                                                   | None |
|    |                                                                                                              |                                                        |      |
| 13 | Other financial or non-financial interests                                                                   | None                                                   | None |
|    |                                                                                                              |                                                        |      |

Please place an "X" next to the following statement to indicate your agreement:

**X** I certify that I have answered every question and have not altered the wording of any of the questions on this form.

## ICMJE DISCLOSURE FORM

Date: August 7<sup>th</sup>, 2021

Your Name: Jeannette Arncken

Manuscript Title: Hepatic Sarcoidosis: Clinical Characteristics and Outcome

Manuscript number (if known): JHEPR-D-21-00154R1

In the interest of transparency, we ask you to disclose all relationships/activities/interests listed below that are related to the content of your manuscript. "Related" means any relation with for-profit or not-for-profit third parties whose interests may be affected by the content of the manuscript. Disclosure represents a commitment to transparency and does not necessarily indicate a bias. If you are in doubt about whether to list a relationship/activity/interest, it is preferable that you do so.

The following questions apply to the author's relationships/activities/interests as they relate to the current manuscript only.

The author's relationships/activities/interests should be defined broadly. For example, if your manuscript pertains to the epidemiology of hypertension, you should declare all relationships with manufacturers of antihypertensive medication, even if that medication is not mentioned in the manuscript.

In item #1 below, report all support for the work reported in this manuscript without time limit. For all other items, the time frame for disclosure is the past 36 months.

|                                                           |                                                                                                                                                                                | Name all entities with whom you have this relationship or indicate none (add rows as needed) | Specifications/Comments (e.g., if payments were made to you or to your institution) |
|-----------------------------------------------------------|--------------------------------------------------------------------------------------------------------------------------------------------------------------------------------|----------------------------------------------------------------------------------------------|-------------------------------------------------------------------------------------|
| <b>Time frame: Since the initial planning of the work</b> |                                                                                                                                                                                |                                                                                              |                                                                                     |
| 1                                                         | All support for the present manuscript (e.g., funding, provision of study materials, medical writing, article processing charges, etc.)<br><b>No time limit for this item.</b> | None                                                                                         | None                                                                                |
|                                                           |                                                                                                                                                                                |                                                                                              |                                                                                     |
|                                                           |                                                                                                                                                                                |                                                                                              |                                                                                     |
|                                                           |                                                                                                                                                                                |                                                                                              |                                                                                     |
|                                                           |                                                                                                                                                                                |                                                                                              |                                                                                     |
|                                                           |                                                                                                                                                                                |                                                                                              |                                                                                     |
|                                                           |                                                                                                                                                                                |                                                                                              |                                                                                     |
| <b>Time frame: past 36 months</b>                         |                                                                                                                                                                                |                                                                                              |                                                                                     |
| 2                                                         | Grants or contracts from any entity (if not indicated in item #1 above).                                                                                                       | None                                                                                         | None                                                                                |
|                                                           |                                                                                                                                                                                |                                                                                              |                                                                                     |
| 3                                                         | Royalties or licenses                                                                                                                                                          | None                                                                                         | None                                                                                |
|                                                           |                                                                                                                                                                                |                                                                                              |                                                                                     |
|                                                           |                                                                                                                                                                                |                                                                                              |                                                                                     |

|    |                                                                                                              |      |      |
|----|--------------------------------------------------------------------------------------------------------------|------|------|
| 4  | Consulting fees                                                                                              | None | None |
|    |                                                                                                              |      |      |
|    |                                                                                                              |      |      |
| 5  | Payment or honoraria for lectures, presentations, speakers bureaus, manuscript writing or educational events | None | None |
|    |                                                                                                              |      |      |
|    |                                                                                                              |      |      |
| 6  | Payment for expert testimony                                                                                 | None | None |
|    |                                                                                                              |      |      |
|    |                                                                                                              |      |      |
| 7  | Support for attending meetings and/or travel                                                                 | None | None |
|    |                                                                                                              |      |      |
|    |                                                                                                              |      |      |
| 8  | Patents planned, issued or pending                                                                           | None | None |
|    |                                                                                                              |      |      |
|    |                                                                                                              |      |      |
| 9  | Participation on a Data Safety Monitoring Board or Advisory Board                                            | None | None |
|    |                                                                                                              |      |      |
|    |                                                                                                              |      |      |
| 10 | Leadership or fiduciary role in other board, society, committee or advocacy group, paid or unpaid            | None | None |
|    |                                                                                                              |      |      |
|    |                                                                                                              |      |      |
| 11 | Stock or stock options                                                                                       | None | None |
|    |                                                                                                              |      |      |
|    |                                                                                                              |      |      |
| 12 | Receipt of equipment, materials, drugs, medical writing, gifts or other services                             | None | None |
|    |                                                                                                              |      |      |
|    |                                                                                                              |      |      |
| 13 | Other financial or non-financial interests                                                                   | None | None |
|    |                                                                                                              |      |      |
|    |                                                                                                              |      |      |

Please place an "X" next to the following statement to indicate your agreement:

**X** I certify that I have answered every question and have not altered the wording of any of the questions on this form.

## ICMJE DISCLOSURE FORM

Date: August 7<sup>th</sup>, 2021

Your Name: Prof. Dr. Christian M. Lange

Manuscript Title: Hepatic Sarcoidosis: Clinical Characteristics and Outcome

Manuscript number (if known): JHEPR-D-21-00154R1

In the interest of transparency, we ask you to disclose all relationships/activities/interests listed below that are related to the content of your manuscript. "Related" means any relation with for-profit or not-for-profit third parties whose interests may be affected by the content of the manuscript. Disclosure represents a commitment to transparency and does not necessarily indicate a bias. If you are in doubt about whether to list a relationship/activity/interest, it is preferable that you do so.

The following questions apply to the author's relationships/activities/interests as they relate to the current manuscript only.

The author's relationships/activities/interests should be defined broadly. For example, if your manuscript pertains to the epidemiology of hypertension, you should declare all relationships with manufacturers of antihypertensive medication, even if that medication is not mentioned in the manuscript.

In item #1 below, report all support for the work reported in this manuscript without time limit. For all other items, the time frame for disclosure is the past 36 months.

|                                                           |                                                                                                                                                                                | Name all entities with whom you have this relationship or indicate none (add rows as needed) | Specifications/Comments (e.g., if payments were made to you or to your institution) |
|-----------------------------------------------------------|--------------------------------------------------------------------------------------------------------------------------------------------------------------------------------|----------------------------------------------------------------------------------------------|-------------------------------------------------------------------------------------|
| <b>Time frame: Since the initial planning of the work</b> |                                                                                                                                                                                |                                                                                              |                                                                                     |
| 1                                                         | All support for the present manuscript (e.g., funding, provision of study materials, medical writing, article processing charges, etc.)<br><b>No time limit for this item.</b> | None                                                                                         | None                                                                                |
|                                                           |                                                                                                                                                                                |                                                                                              |                                                                                     |
|                                                           |                                                                                                                                                                                |                                                                                              |                                                                                     |
|                                                           |                                                                                                                                                                                |                                                                                              |                                                                                     |
|                                                           |                                                                                                                                                                                |                                                                                              |                                                                                     |
|                                                           |                                                                                                                                                                                |                                                                                              |                                                                                     |
|                                                           |                                                                                                                                                                                |                                                                                              |                                                                                     |
| <b>Time frame: past 36 months</b>                         |                                                                                                                                                                                |                                                                                              |                                                                                     |
| 2                                                         | Grants or contracts from any entity (if not indicated in item #1 above).                                                                                                       | None                                                                                         | None                                                                                |
|                                                           |                                                                                                                                                                                |                                                                                              |                                                                                     |
|                                                           |                                                                                                                                                                                |                                                                                              |                                                                                     |
| 3                                                         | Royalties or licenses                                                                                                                                                          | None                                                                                         | None                                                                                |
|                                                           |                                                                                                                                                                                |                                                                                              |                                                                                     |
|                                                           |                                                                                                                                                                                |                                                                                              |                                                                                     |

|    |                                                                                                              |                                                                                                          |      |
|----|--------------------------------------------------------------------------------------------------------------|----------------------------------------------------------------------------------------------------------|------|
| 4  | Consulting fees                                                                                              | Consulting fees from AbbVie, Bristol-Myers Squibb, Falk, Janssen and Merk/MSD outside the submitted work |      |
|    |                                                                                                              |                                                                                                          |      |
|    |                                                                                                              |                                                                                                          |      |
| 5  | Payment or honoraria for lectures, presentations, speakers bureaus, manuscript writing or educational events | Speaker fees from AbbVie, Bristol-Myers Squibb, Falk, Janssen and Merk/MSD outside the submitted work.   |      |
|    |                                                                                                              |                                                                                                          |      |
|    |                                                                                                              |                                                                                                          |      |
| 6  | Payment for expert testimony                                                                                 | None                                                                                                     | None |
|    |                                                                                                              |                                                                                                          |      |
|    |                                                                                                              |                                                                                                          |      |
| 7  | Support for attending meetings and/or travel                                                                 | None                                                                                                     | None |
|    |                                                                                                              |                                                                                                          |      |
|    |                                                                                                              |                                                                                                          |      |
| 8  | Patents planned, issued or pending                                                                           | None                                                                                                     | None |
|    |                                                                                                              |                                                                                                          |      |
|    |                                                                                                              |                                                                                                          |      |
| 9  | Participation on a Data Safety Monitoring Board or Advisory Board                                            | None                                                                                                     | None |
|    |                                                                                                              |                                                                                                          |      |
|    |                                                                                                              |                                                                                                          |      |
| 10 | Leadership or fiduciary role in other board, society, committee or advocacy group, paid or unpaid            | None                                                                                                     | None |
|    |                                                                                                              |                                                                                                          |      |
|    |                                                                                                              |                                                                                                          |      |
| 11 | Stock or stock options                                                                                       | None                                                                                                     | None |
|    |                                                                                                              |                                                                                                          |      |
|    |                                                                                                              |                                                                                                          |      |
| 12 | Receipt of equipment, materials, drugs, medical writing, gifts or other services                             | None                                                                                                     | None |
|    |                                                                                                              |                                                                                                          |      |
|    |                                                                                                              |                                                                                                          |      |
| 13 | Other financial or non-financial interests                                                                   | None                                                                                                     | None |
|    |                                                                                                              |                                                                                                          |      |
|    |                                                                                                              |                                                                                                          |      |

Please place an "X" next to the following statement to indicate your agreement:

**X I certify that I have answered every question and have not altered the wording of any of the questions on this form.**

## ICMJE DISCLOSURE FORM

Date: August 7<sup>th</sup>, 2021

Your Name: Dr. Katharina Willuweit

Manuscript Title: Hepatic Sarcoidosis: Clinical Characteristics and Outcome

Manuscript number (if known): JHEPR-D-21-00154R1

In the interest of transparency, we ask you to disclose all relationships/activities/interests listed below that are related to the content of your manuscript. "Related" means any relation with for-profit or not-for-profit third parties whose interests may be affected by the content of the manuscript. Disclosure represents a commitment to transparency and does not necessarily indicate a bias. If you are in doubt about whether to list a relationship/activity/interest, it is preferable that you do so.

The following questions apply to the author's relationships/activities/interests as they relate to the current manuscript only.

The author's relationships/activities/interests should be defined broadly. For example, if your manuscript pertains to the epidemiology of hypertension, you should declare all relationships with manufacturers of antihypertensive medication, even if that medication is not mentioned in the manuscript.

In item #1 below, report all support for the work reported in this manuscript without time limit. For all other items, the time frame for disclosure is the past 36 months.

|                                                           |                                                                                                                                                                                | Name all entities with whom you have this relationship or indicate none (add rows as needed) | Specifications/Comments (e.g., if payments were made to you or to your institution) |
|-----------------------------------------------------------|--------------------------------------------------------------------------------------------------------------------------------------------------------------------------------|----------------------------------------------------------------------------------------------|-------------------------------------------------------------------------------------|
| <b>Time frame: Since the initial planning of the work</b> |                                                                                                                                                                                |                                                                                              |                                                                                     |
| 1                                                         | All support for the present manuscript (e.g., funding, provision of study materials, medical writing, article processing charges, etc.)<br><b>No time limit for this item.</b> | None                                                                                         | None                                                                                |
|                                                           |                                                                                                                                                                                |                                                                                              |                                                                                     |
|                                                           |                                                                                                                                                                                |                                                                                              |                                                                                     |
|                                                           |                                                                                                                                                                                |                                                                                              |                                                                                     |
|                                                           |                                                                                                                                                                                |                                                                                              |                                                                                     |
|                                                           |                                                                                                                                                                                |                                                                                              |                                                                                     |
|                                                           |                                                                                                                                                                                |                                                                                              |                                                                                     |
| <b>Time frame: past 36 months</b>                         |                                                                                                                                                                                |                                                                                              |                                                                                     |
| 2                                                         | Grants or contracts from any entity (if not indicated in item #1 above).                                                                                                       | None                                                                                         | None                                                                                |
|                                                           |                                                                                                                                                                                |                                                                                              |                                                                                     |
| 3                                                         | Royalties or licenses                                                                                                                                                          | None                                                                                         | None                                                                                |
|                                                           |                                                                                                                                                                                |                                                                                              |                                                                                     |
| 4                                                         | Consulting fees                                                                                                                                                                | None                                                                                         | None                                                                                |

|    |                                                                                                              |      |      |
|----|--------------------------------------------------------------------------------------------------------------|------|------|
|    |                                                                                                              |      |      |
|    |                                                                                                              |      |      |
| 5  | Payment or honoraria for lectures, presentations, speakers bureaus, manuscript writing or educational events | None | None |
|    |                                                                                                              |      |      |
| 6  | Payment for expert testimony                                                                                 | None | None |
|    |                                                                                                              |      |      |
| 7  | Support for attending meetings and/or travel                                                                 | None | None |
|    |                                                                                                              |      |      |
| 8  | Patents planned, issued or pending                                                                           | None | None |
|    |                                                                                                              |      |      |
| 9  | Participation on a Data Safety Monitoring Board or Advisory Board                                            | None | None |
|    |                                                                                                              |      |      |
| 10 | Leadership or fiduciary role in other board, society, committee or advocacy group, paid or unpaid            | None | None |
|    |                                                                                                              |      |      |
| 11 | Stock or stock options                                                                                       | None | None |
|    |                                                                                                              |      |      |
| 12 | Receipt of equipment, materials, drugs, medical writing, gifts or other services                             | None | None |
|    |                                                                                                              |      |      |
| 13 | Other financial or non-financial interests                                                                   | None | None |
|    |                                                                                                              |      |      |

Please place an "X" next to the following statement to indicate your agreement:

**X** I certify that I have answered every question and have not altered the wording of any of the questions on this form.



## ICMJE DISCLOSURE FORM

Date: August 7<sup>th</sup>, 2021

Your Name: Prof. Dr. Jörn M. Schattenberg

Manuscript Title: Hepatic Sarcoidosis: Clinical Characteristics and Outcome

Manuscript number (if known): JHEPR-D-21-00154R1

In the interest of transparency, we ask you to disclose all relationships/activities/interests listed below that are related to the content of your manuscript. "Related" means any relation with for-profit or not-for-profit third parties whose interests may be affected by the content of the manuscript. Disclosure represents a commitment to transparency and does not necessarily indicate a bias. If you are in doubt about whether to list a relationship/activity/interest, it is preferable that you do so.

The following questions apply to the author's relationships/activities/interests as they relate to the current manuscript only.

The author's relationships/activities/interests should be defined broadly. For example, if your manuscript pertains to the epidemiology of hypertension, you should declare all relationships with manufacturers of antihypertensive medication, even if that medication is not mentioned in the manuscript.

In item #1 below, report all support for the work reported in this manuscript without time limit. For all other items, the time frame for disclosure is the past 36 months.

|                                                           |                                                                                                                                                                                | Name all entities with whom you have this relationship or indicate none (add rows as needed)                        | Specifications/Comments (e.g., if payments were made to you or to your institution) |
|-----------------------------------------------------------|--------------------------------------------------------------------------------------------------------------------------------------------------------------------------------|---------------------------------------------------------------------------------------------------------------------|-------------------------------------------------------------------------------------|
| <b>Time frame: Since the initial planning of the work</b> |                                                                                                                                                                                |                                                                                                                     |                                                                                     |
| 1                                                         | All support for the present manuscript (e.g., funding, provision of study materials, medical writing, article processing charges, etc.)<br><b>No time limit for this item.</b> | None                                                                                                                | None                                                                                |
|                                                           |                                                                                                                                                                                |                                                                                                                     |                                                                                     |
|                                                           |                                                                                                                                                                                |                                                                                                                     |                                                                                     |
|                                                           |                                                                                                                                                                                |                                                                                                                     |                                                                                     |
|                                                           |                                                                                                                                                                                |                                                                                                                     |                                                                                     |
|                                                           |                                                                                                                                                                                |                                                                                                                     |                                                                                     |
|                                                           |                                                                                                                                                                                |                                                                                                                     |                                                                                     |
|                                                           |                                                                                                                                                                                |                                                                                                                     |                                                                                     |
| <b>Time frame: past 36 months</b>                         |                                                                                                                                                                                |                                                                                                                     |                                                                                     |
| 2                                                         | Grants or contracts from any entity (if not indicated in item #1 above).                                                                                                       | Research support from Gilead Sciences, Boehringer Ingelheim and Siemens Healthcare GmbH outside the submitted work. |                                                                                     |
|                                                           |                                                                                                                                                                                |                                                                                                                     |                                                                                     |
|                                                           |                                                                                                                                                                                |                                                                                                                     |                                                                                     |
| 3                                                         | Royalties or licenses                                                                                                                                                          | None                                                                                                                | None                                                                                |

|    |                                                                                                              |                                                                                                                                                                                                                               |      |
|----|--------------------------------------------------------------------------------------------------------------|-------------------------------------------------------------------------------------------------------------------------------------------------------------------------------------------------------------------------------|------|
|    |                                                                                                              |                                                                                                                                                                                                                               |      |
| 4  | Consulting fees                                                                                              | Consulting fees from BMS, Boehringer Ingelheim, Echosens, Genfit, Gilead Sciences, Intercept Pharmaceuticals, Madrigal, Nordic Bioscience, Novartis, Pfizer, Roche, Sanofi, Siemens Healthcare GmbH outside the present work. |      |
| 5  | Payment or honoraria for lectures, presentations, speakers bureaus, manuscript writing or educational events | Speaker from Falk Foundation, MSD Sharp & Dohme GmbH outside the submitted work.                                                                                                                                              | None |
| 6  | Payment for expert testimony                                                                                 | None                                                                                                                                                                                                                          | None |
| 7  | Support for attending meetings and/or travel                                                                 | None                                                                                                                                                                                                                          | None |
| 8  | Patents planned, issued or pending                                                                           | None                                                                                                                                                                                                                          | None |
| 9  | Participation on a Data Safety Monitoring Board or Advisory Board                                            | None                                                                                                                                                                                                                          | None |
| 10 | Leadership or fiduciary role in other board, society, committee or advocacy group, paid or unpaid            | None                                                                                                                                                                                                                          | None |
| 11 | Stock or stock options                                                                                       | None                                                                                                                                                                                                                          | None |
| 12 | Receipt of equipment, materials, drugs, medical writing, gifts or other services                             | None                                                                                                                                                                                                                          | None |
| 13 | Other financial or non-financial interests                                                                   | None                                                                                                                                                                                                                          | None |

|  |  |  |  |
|--|--|--|--|
|  |  |  |  |
|  |  |  |  |

**Please place an "X" next to the following statement to indicate your agreement:**

**X I certify that I have answered every question and have not altered the wording of any of the questions on this form.**

## ICMJE DISCLOSURE FORM

Date: August 7<sup>th</sup>, 2021

Your Name: Dr. Jessica Seessle

Manuscript Title: Hepatic Sarcoidosis: Clinical Characteristics and Outcome

Manuscript number (if known): JHEPR-D-21-00154R1

In the interest of transparency, we ask you to disclose all relationships/activities/interests listed below that are related to the content of your manuscript. "Related" means any relation with for-profit or not-for-profit third parties whose interests may be affected by the content of the manuscript. Disclosure represents a commitment to transparency and does not necessarily indicate a bias. If you are in doubt about whether to list a relationship/activity/interest, it is preferable that you do so.

The following questions apply to the author's relationships/activities/interests as they relate to the current manuscript only.

The author's relationships/activities/interests should be defined broadly. For example, if your manuscript pertains to the epidemiology of hypertension, you should declare all relationships with manufacturers of antihypertensive medication, even if that medication is not mentioned in the manuscript.

In item #1 below, report all support for the work reported in this manuscript without time limit. For all other items, the time frame for disclosure is the past 36 months.

|                                                           |                                                                                                                                                                                | Name all entities with whom you have this relationship or indicate none (add rows as needed) | Specifications/Comments (e.g., if payments were made to you or to your institution) |
|-----------------------------------------------------------|--------------------------------------------------------------------------------------------------------------------------------------------------------------------------------|----------------------------------------------------------------------------------------------|-------------------------------------------------------------------------------------|
| <b>Time frame: Since the initial planning of the work</b> |                                                                                                                                                                                |                                                                                              |                                                                                     |
| 1                                                         | All support for the present manuscript (e.g., funding, provision of study materials, medical writing, article processing charges, etc.)<br><b>No time limit for this item.</b> | None                                                                                         | None                                                                                |
|                                                           |                                                                                                                                                                                |                                                                                              |                                                                                     |
|                                                           |                                                                                                                                                                                |                                                                                              |                                                                                     |
|                                                           |                                                                                                                                                                                |                                                                                              |                                                                                     |
|                                                           |                                                                                                                                                                                |                                                                                              |                                                                                     |
|                                                           |                                                                                                                                                                                |                                                                                              |                                                                                     |
|                                                           |                                                                                                                                                                                |                                                                                              |                                                                                     |
| <b>Time frame: past 36 months</b>                         |                                                                                                                                                                                |                                                                                              |                                                                                     |
| 2                                                         | Grants or contracts from any entity (if not indicated in item #1 above).                                                                                                       | None                                                                                         | None                                                                                |
|                                                           |                                                                                                                                                                                |                                                                                              |                                                                                     |
| 3                                                         | Royalties or licenses                                                                                                                                                          | None                                                                                         | None                                                                                |
|                                                           |                                                                                                                                                                                |                                                                                              |                                                                                     |
| 4                                                         | Consulting fees                                                                                                                                                                | None                                                                                         | None                                                                                |

|    |                                                                                                              |      |      |
|----|--------------------------------------------------------------------------------------------------------------|------|------|
|    |                                                                                                              |      |      |
|    |                                                                                                              |      |      |
| 5  | Payment or honoraria for lectures, presentations, speakers bureaus, manuscript writing or educational events | None | None |
|    |                                                                                                              |      |      |
| 6  | Payment for expert testimony                                                                                 | None | None |
|    |                                                                                                              |      |      |
| 7  | Support for attending meetings and/or travel                                                                 | None | None |
|    |                                                                                                              |      |      |
| 8  | Patents planned, issued or pending                                                                           | None | None |
|    |                                                                                                              |      |      |
| 9  | Participation on a Data Safety Monitoring Board or Advisory Board                                            | None | None |
|    |                                                                                                              |      |      |
| 10 | Leadership or fiduciary role in other board, society, committee or advocacy group, paid or unpaid            | None | None |
|    |                                                                                                              |      |      |
| 11 | Stock or stock options                                                                                       | None | None |
|    |                                                                                                              |      |      |
| 12 | Receipt of equipment, materials, drugs, medical writing, gifts or other services                             | None | None |
|    |                                                                                                              |      |      |
| 13 | Other financial or non-financial interests                                                                   | None | None |
|    |                                                                                                              |      |      |

Please place an "X" next to the following statement to indicate your agreement:

**X** I certify that I have answered every question and have not altered the wording of any of the questions on this form.

## ICMJE DISCLOSURE FORM

Date: August 7<sup>th</sup>, 2021

Your Name: Dr. Julia Lang-Meli

Manuscript Title: Hepatic Sarcoidosis: Clinical Characteristics and Outcome

Manuscript number (if known): JHEPR-D-21-00154R1

In the interest of transparency, we ask you to disclose all relationships/activities/interests listed below that are related to the content of your manuscript. "Related" means any relation with for-profit or not-for-profit third parties whose interests may be affected by the content of the manuscript. Disclosure represents a commitment to transparency and does not necessarily indicate a bias. If you are in doubt about whether to list a relationship/activity/interest, it is preferable that you do so.

The following questions apply to the author's relationships/activities/interests as they relate to the current manuscript only.

The author's relationships/activities/interests should be defined broadly. For example, if your manuscript pertains to the epidemiology of hypertension, you should declare all relationships with manufacturers of antihypertensive medication, even if that medication is not mentioned in the manuscript.

In item #1 below, report all support for the work reported in this manuscript without time limit. For all other items, the time frame for disclosure is the past 36 months.

|                                                           |                                                                                                                                                                                | Name all entities with whom you have this relationship or indicate none (add rows as needed) | Specifications/Comments (e.g., if payments were made to you or to your institution) |
|-----------------------------------------------------------|--------------------------------------------------------------------------------------------------------------------------------------------------------------------------------|----------------------------------------------------------------------------------------------|-------------------------------------------------------------------------------------|
| <b>Time frame: Since the initial planning of the work</b> |                                                                                                                                                                                |                                                                                              |                                                                                     |
| 1                                                         | All support for the present manuscript (e.g., funding, provision of study materials, medical writing, article processing charges, etc.)<br><b>No time limit for this item.</b> | None                                                                                         | None                                                                                |
|                                                           |                                                                                                                                                                                |                                                                                              |                                                                                     |
|                                                           |                                                                                                                                                                                |                                                                                              |                                                                                     |
|                                                           |                                                                                                                                                                                |                                                                                              |                                                                                     |
|                                                           |                                                                                                                                                                                |                                                                                              |                                                                                     |
|                                                           |                                                                                                                                                                                |                                                                                              |                                                                                     |
|                                                           |                                                                                                                                                                                |                                                                                              |                                                                                     |
| <b>Time frame: past 36 months</b>                         |                                                                                                                                                                                |                                                                                              |                                                                                     |
| 2                                                         | Grants or contracts from any entity (if not indicated in item #1 above).                                                                                                       | None                                                                                         | None                                                                                |
|                                                           |                                                                                                                                                                                |                                                                                              |                                                                                     |
| 3                                                         | Royalties or licenses                                                                                                                                                          | None                                                                                         | None                                                                                |
|                                                           |                                                                                                                                                                                |                                                                                              |                                                                                     |
| 4                                                         | Consulting fees                                                                                                                                                                | None                                                                                         | None                                                                                |

|    |                                                                                                              |      |      |
|----|--------------------------------------------------------------------------------------------------------------|------|------|
|    |                                                                                                              |      |      |
|    |                                                                                                              |      |      |
| 5  | Payment or honoraria for lectures, presentations, speakers bureaus, manuscript writing or educational events | None | None |
|    |                                                                                                              |      |      |
|    |                                                                                                              |      |      |
| 6  | Payment for expert testimony                                                                                 | None | None |
|    |                                                                                                              |      |      |
|    |                                                                                                              |      |      |
| 7  | Support for attending meetings and/or travel                                                                 | None | None |
|    |                                                                                                              |      |      |
|    |                                                                                                              |      |      |
| 8  | Patents planned, issued or pending                                                                           | None | None |
|    |                                                                                                              |      |      |
|    |                                                                                                              |      |      |
| 9  | Participation on a Data Safety Monitoring Board or Advisory Board                                            | None | None |
|    |                                                                                                              |      |      |
|    |                                                                                                              |      |      |
| 10 | Leadership or fiduciary role in other board, society, committee or advocacy group, paid or unpaid            | None | None |
|    |                                                                                                              |      |      |
|    |                                                                                                              |      |      |
| 11 | Stock or stock options                                                                                       | None | None |
|    |                                                                                                              |      |      |
|    |                                                                                                              |      |      |
| 12 | Receipt of equipment, materials, drugs, medical writing, gifts or other services                             | None | None |
|    |                                                                                                              |      |      |
|    |                                                                                                              |      |      |
| 13 | Other financial or non-financial interests                                                                   | None | None |
|    |                                                                                                              |      |      |
|    |                                                                                                              |      |      |

Please place an "X" next to the following statement to indicate your agreement:

**X** I certify that I have answered every question and have not altered the wording of any of the questions on this form.

## ICMJE DISCLOSURE FORM

Date: August 7<sup>th</sup>, 2021

Your Name: PD Dr. Tobias Böttler

Manuscript Title: Hepatic Sarcoidosis: Clinical Characteristics and Outcome

Manuscript number (if known): JHEPR-D-21-00154R1

In the interest of transparency, we ask you to disclose all relationships/activities/interests listed below that are related to the content of your manuscript. "Related" means any relation with for-profit or not-for-profit third parties whose interests may be affected by the content of the manuscript. Disclosure represents a commitment to transparency and does not necessarily indicate a bias. If you are in doubt about whether to list a relationship/activity/interest, it is preferable that you do so.

The following questions apply to the author's relationships/activities/interests as they relate to the current manuscript only.

The author's relationships/activities/interests should be defined broadly. For example, if your manuscript pertains to the epidemiology of hypertension, you should declare all relationships with manufacturers of antihypertensive medication, even if that medication is not mentioned in the manuscript.

In item #1 below, report all support for the work reported in this manuscript without time limit. For all other items, the time frame for disclosure is the past 36 months.

|                                                           |                                                                                                                                                                                | Name all entities with whom you have this relationship or indicate none (add rows as needed) | Specifications/Comments (e.g., if payments were made to you or to your institution) |
|-----------------------------------------------------------|--------------------------------------------------------------------------------------------------------------------------------------------------------------------------------|----------------------------------------------------------------------------------------------|-------------------------------------------------------------------------------------|
| <b>Time frame: Since the initial planning of the work</b> |                                                                                                                                                                                |                                                                                              |                                                                                     |
| 1                                                         | All support for the present manuscript (e.g., funding, provision of study materials, medical writing, article processing charges, etc.)<br><b>No time limit for this item.</b> | None                                                                                         | None                                                                                |
|                                                           |                                                                                                                                                                                |                                                                                              |                                                                                     |
|                                                           |                                                                                                                                                                                |                                                                                              |                                                                                     |
|                                                           |                                                                                                                                                                                |                                                                                              |                                                                                     |
|                                                           |                                                                                                                                                                                |                                                                                              |                                                                                     |
|                                                           |                                                                                                                                                                                |                                                                                              |                                                                                     |
|                                                           |                                                                                                                                                                                |                                                                                              |                                                                                     |
|                                                           |                                                                                                                                                                                |                                                                                              |                                                                                     |
| <b>Time frame: past 36 months</b>                         |                                                                                                                                                                                |                                                                                              |                                                                                     |
| 2                                                         | Grants or contracts from any entity (if not indicated in item #1 above).                                                                                                       | None                                                                                         | None                                                                                |
|                                                           |                                                                                                                                                                                |                                                                                              |                                                                                     |
|                                                           |                                                                                                                                                                                |                                                                                              |                                                                                     |
| 3                                                         | Royalties or licenses                                                                                                                                                          | None                                                                                         | None                                                                                |
|                                                           |                                                                                                                                                                                |                                                                                              |                                                                                     |
|                                                           |                                                                                                                                                                                |                                                                                              |                                                                                     |
| 4                                                         | Consulting fees                                                                                                                                                                | None                                                                                         | None                                                                                |



|    |                                                                                                              |      |      |
|----|--------------------------------------------------------------------------------------------------------------|------|------|
|    |                                                                                                              |      |      |
|    |                                                                                                              |      |      |
| 5  | Payment or honoraria for lectures, presentations, speakers bureaus, manuscript writing or educational events | None | None |
|    |                                                                                                              |      |      |
| 6  | Payment for expert testimony                                                                                 | None | None |
|    |                                                                                                              |      |      |
| 7  | Support for attending meetings and/or travel                                                                 | None | None |
|    |                                                                                                              |      |      |
| 8  | Patents planned, issued or pending                                                                           | None | None |
|    |                                                                                                              |      |      |
| 9  | Participation on a Data Safety Monitoring Board or Advisory Board                                            | None | None |
|    |                                                                                                              |      |      |
| 10 | Leadership or fiduciary role in other board, society, committee or advocacy group, paid or unpaid            | None | None |
|    |                                                                                                              |      |      |
| 11 | Stock or stock options                                                                                       | None | None |
|    |                                                                                                              |      |      |
| 12 | Receipt of equipment, materials, drugs, medical writing, gifts or other services                             | None | None |
|    |                                                                                                              |      |      |
| 13 | Other financial or non-financial interests                                                                   | None | None |
|    |                                                                                                              |      |      |

Please place an "X" next to the following statement to indicate your agreement:

**X** I certify that I have answered every question and have not altered the wording of any of the questions on this form.

## ICMJE DISCLOSURE FORM

Date: August 7<sup>th</sup>, 2021

Your Name: Dr. Julia Dietz

Manuscript Title: Hepatic Sarcoidosis: Clinical Characteristics and Outcome

Manuscript number (if known): JHEPR-D-21-00154R1

In the interest of transparency, we ask you to disclose all relationships/activities/interests listed below that are related to the content of your manuscript. "Related" means any relation with for-profit or not-for-profit third parties whose interests may be affected by the content of the manuscript. Disclosure represents a commitment to transparency and does not necessarily indicate a bias. If you are in doubt about whether to list a relationship/activity/interest, it is preferable that you do so.

The following questions apply to the author's relationships/activities/interests as they relate to the current manuscript only.

The author's relationships/activities/interests should be defined broadly. For example, if your manuscript pertains to the epidemiology of hypertension, you should declare all relationships with manufacturers of antihypertensive medication, even if that medication is not mentioned in the manuscript.

In item #1 below, report all support for the work reported in this manuscript without time limit. For all other items, the time frame for disclosure is the past 36 months.

|                                                           |                                                                                                                                                                                | Name all entities with whom you have this relationship or indicate none (add rows as needed) | Specifications/Comments (e.g., if payments were made to you or to your institution) |
|-----------------------------------------------------------|--------------------------------------------------------------------------------------------------------------------------------------------------------------------------------|----------------------------------------------------------------------------------------------|-------------------------------------------------------------------------------------|
| <b>Time frame: Since the initial planning of the work</b> |                                                                                                                                                                                |                                                                                              |                                                                                     |
| 1                                                         | All support for the present manuscript (e.g., funding, provision of study materials, medical writing, article processing charges, etc.)<br><b>No time limit for this item.</b> | None                                                                                         | None                                                                                |
|                                                           |                                                                                                                                                                                |                                                                                              |                                                                                     |
|                                                           |                                                                                                                                                                                |                                                                                              |                                                                                     |
|                                                           |                                                                                                                                                                                |                                                                                              |                                                                                     |
|                                                           |                                                                                                                                                                                |                                                                                              |                                                                                     |
|                                                           |                                                                                                                                                                                |                                                                                              |                                                                                     |
|                                                           |                                                                                                                                                                                |                                                                                              |                                                                                     |
|                                                           |                                                                                                                                                                                |                                                                                              |                                                                                     |
| <b>Time frame: past 36 months</b>                         |                                                                                                                                                                                |                                                                                              |                                                                                     |
| 2                                                         | Grants or contracts from any entity (if not indicated in item #1 above).                                                                                                       | Research support from Gilead Sciences outside the submitted work.                            |                                                                                     |
|                                                           |                                                                                                                                                                                |                                                                                              |                                                                                     |
|                                                           |                                                                                                                                                                                |                                                                                              |                                                                                     |
| 3                                                         | Royalties or licenses                                                                                                                                                          | None                                                                                         | None                                                                                |
|                                                           |                                                                                                                                                                                |                                                                                              |                                                                                     |
|                                                           |                                                                                                                                                                                |                                                                                              |                                                                                     |

|    |                                                                                                              |      |      |
|----|--------------------------------------------------------------------------------------------------------------|------|------|
| 4  | Consulting fees                                                                                              | None | None |
|    |                                                                                                              |      |      |
|    |                                                                                                              |      |      |
| 5  | Payment or honoraria for lectures, presentations, speakers bureaus, manuscript writing or educational events | None | None |
|    |                                                                                                              |      |      |
|    |                                                                                                              |      |      |
| 6  | Payment for expert testimony                                                                                 | None | None |
|    |                                                                                                              |      |      |
|    |                                                                                                              |      |      |
| 7  | Support for attending meetings and/or travel                                                                 | None | None |
|    |                                                                                                              |      |      |
|    |                                                                                                              |      |      |
| 8  | Patents planned, issued or pending                                                                           | None | None |
|    |                                                                                                              |      |      |
|    |                                                                                                              |      |      |
| 9  | Participation on a Data Safety Monitoring Board or Advisory Board                                            | None | None |
|    |                                                                                                              |      |      |
|    |                                                                                                              |      |      |
| 10 | Leadership or fiduciary role in other board, society, committee or advocacy group, paid or unpaid            | None | None |
|    |                                                                                                              |      |      |
|    |                                                                                                              |      |      |
| 11 | Stock or stock options                                                                                       | None | None |
|    |                                                                                                              |      |      |
|    |                                                                                                              |      |      |
| 12 | Receipt of equipment, materials, drugs, medical writing, gifts or other services                             | None | None |
|    |                                                                                                              |      |      |
|    |                                                                                                              |      |      |
| 13 | Other financial or non-financial interests                                                                   | None | None |
|    |                                                                                                              |      |      |
|    |                                                                                                              |      |      |

Please place an "X" next to the following statement to indicate your agreement:

**X** I certify that I have answered every question and have not altered the wording of any of the questions on this form.

## ICMJE DISCLOSURE FORM

Date: August 7<sup>th</sup>, 2021

Your Name: Dr. Nils Wetzstein

Manuscript Title: Hepatic Sarcoidosis: Clinical Characteristics and Outcome

Manuscript number (if known): JHEPR-D-21-00154R1

In the interest of transparency, we ask you to disclose all relationships/activities/interests listed below that are related to the content of your manuscript. "Related" means any relation with for-profit or not-for-profit third parties whose interests may be affected by the content of the manuscript. Disclosure represents a commitment to transparency and does not necessarily indicate a bias. If you are in doubt about whether to list a relationship/activity/interest, it is preferable that you do so.

The following questions apply to the author's relationships/activities/interests as they relate to the current manuscript only.

The author's relationships/activities/interests should be defined broadly. For example, if your manuscript pertains to the epidemiology of hypertension, you should declare all relationships with manufacturers of antihypertensive medication, even if that medication is not mentioned in the manuscript.

In item #1 below, report all support for the work reported in this manuscript without time limit. For all other items, the time frame for disclosure is the past 36 months.

|                                                           |                                                                                                                                                                                | Name all entities with whom you have this relationship or indicate none (add rows as needed) | Specifications/Comments (e.g., if payments were made to you or to your institution) |
|-----------------------------------------------------------|--------------------------------------------------------------------------------------------------------------------------------------------------------------------------------|----------------------------------------------------------------------------------------------|-------------------------------------------------------------------------------------|
| <b>Time frame: Since the initial planning of the work</b> |                                                                                                                                                                                |                                                                                              |                                                                                     |
| 1                                                         | All support for the present manuscript (e.g., funding, provision of study materials, medical writing, article processing charges, etc.)<br><b>No time limit for this item.</b> | None                                                                                         | None                                                                                |
|                                                           |                                                                                                                                                                                |                                                                                              |                                                                                     |
|                                                           |                                                                                                                                                                                |                                                                                              |                                                                                     |
|                                                           |                                                                                                                                                                                |                                                                                              |                                                                                     |
|                                                           |                                                                                                                                                                                |                                                                                              |                                                                                     |
|                                                           |                                                                                                                                                                                |                                                                                              |                                                                                     |
|                                                           |                                                                                                                                                                                |                                                                                              |                                                                                     |
|                                                           |                                                                                                                                                                                |                                                                                              |                                                                                     |
| <b>Time frame: past 36 months</b>                         |                                                                                                                                                                                |                                                                                              |                                                                                     |
| 2                                                         | Grants or contracts from any entity (if not indicated in item #1 above).                                                                                                       | None                                                                                         | None                                                                                |
|                                                           |                                                                                                                                                                                |                                                                                              |                                                                                     |
|                                                           |                                                                                                                                                                                |                                                                                              |                                                                                     |
| 3                                                         | Royalties or licenses                                                                                                                                                          | None                                                                                         | None                                                                                |
|                                                           |                                                                                                                                                                                |                                                                                              |                                                                                     |
|                                                           |                                                                                                                                                                                |                                                                                              |                                                                                     |
| 4                                                         | Consulting fees                                                                                                                                                                | None                                                                                         | None                                                                                |

|    |                                                                                                              |      |      |
|----|--------------------------------------------------------------------------------------------------------------|------|------|
|    |                                                                                                              |      |      |
|    |                                                                                                              |      |      |
| 5  | Payment or honoraria for lectures, presentations, speakers bureaus, manuscript writing or educational events | None | None |
|    |                                                                                                              |      |      |
| 6  | Payment for expert testimony                                                                                 | None | None |
|    |                                                                                                              |      |      |
| 7  | Support for attending meetings and/or travel                                                                 | None | None |
|    |                                                                                                              |      |      |
| 8  | Patents planned, issued or pending                                                                           | None | None |
|    |                                                                                                              |      |      |
| 9  | Participation on a Data Safety Monitoring Board or Advisory Board                                            | None | None |
|    |                                                                                                              |      |      |
| 10 | Leadership or fiduciary role in other board, society, committee or advocacy group, paid or unpaid            | None | None |
|    |                                                                                                              |      |      |
| 11 | Stock or stock options                                                                                       | None | None |
|    |                                                                                                              |      |      |
| 12 | Receipt of equipment, materials, drugs, medical writing, gifts or other services                             | None | None |
|    |                                                                                                              |      |      |
| 13 | Other financial or non-financial interests                                                                   | None | None |
|    |                                                                                                              |      |      |

Please place an "X" next to the following statement to indicate your agreement:

**X** I certify that I have answered every question and have not altered the wording of any of the questions on this form.

## ICMJE DISCLOSURE FORM

Date: August 7<sup>th</sup>, 2021

Your Name: Dr. Antonia Mondorf

Manuscript Title: Hepatic Sarcoidosis: Clinical Characteristics and Outcome

Manuscript number (if known): JHEPR-D-21-00154R1

In the interest of transparency, we ask you to disclose all relationships/activities/interests listed below that are related to the content of your manuscript. "Related" means any relation with for-profit or not-for-profit third parties whose interests may be affected by the content of the manuscript. Disclosure represents a commitment to transparency and does not necessarily indicate a bias. If you are in doubt about whether to list a relationship/activity/interest, it is preferable that you do so.

The following questions apply to the author's relationships/activities/interests as they relate to the current manuscript only.

The author's relationships/activities/interests should be defined broadly. For example, if your manuscript pertains to the epidemiology of hypertension, you should declare all relationships with manufacturers of antihypertensive medication, even if that medication is not mentioned in the manuscript.

In item #1 below, report all support for the work reported in this manuscript without time limit. For all other items, the time frame for disclosure is the past 36 months.

|                                                           |                                                                                                                                                                                | Name all entities with whom you have this relationship or indicate none (add rows as needed) | Specifications/Comments (e.g., if payments were made to you or to your institution) |
|-----------------------------------------------------------|--------------------------------------------------------------------------------------------------------------------------------------------------------------------------------|----------------------------------------------------------------------------------------------|-------------------------------------------------------------------------------------|
| <b>Time frame: Since the initial planning of the work</b> |                                                                                                                                                                                |                                                                                              |                                                                                     |
| 1                                                         | All support for the present manuscript (e.g., funding, provision of study materials, medical writing, article processing charges, etc.)<br><b>No time limit for this item.</b> | None                                                                                         | None                                                                                |
|                                                           |                                                                                                                                                                                |                                                                                              |                                                                                     |
|                                                           |                                                                                                                                                                                |                                                                                              |                                                                                     |
|                                                           |                                                                                                                                                                                |                                                                                              |                                                                                     |
|                                                           |                                                                                                                                                                                |                                                                                              |                                                                                     |
|                                                           |                                                                                                                                                                                |                                                                                              |                                                                                     |
|                                                           |                                                                                                                                                                                |                                                                                              |                                                                                     |
| <b>Time frame: past 36 months</b>                         |                                                                                                                                                                                |                                                                                              |                                                                                     |
| 2                                                         | Grants or contracts from any entity (if not indicated in item #1 above).                                                                                                       | None                                                                                         | None                                                                                |
|                                                           |                                                                                                                                                                                |                                                                                              |                                                                                     |
| 3                                                         | Royalties or licenses                                                                                                                                                          | None                                                                                         | None                                                                                |
|                                                           |                                                                                                                                                                                |                                                                                              |                                                                                     |
| 4                                                         | Consulting fees                                                                                                                                                                | None                                                                                         | None                                                                                |

|    |                                                                                                              |      |      |
|----|--------------------------------------------------------------------------------------------------------------|------|------|
|    |                                                                                                              |      |      |
|    |                                                                                                              |      |      |
| 5  | Payment or honoraria for lectures, presentations, speakers bureaus, manuscript writing or educational events | None | None |
|    |                                                                                                              |      |      |
| 6  | Payment for expert testimony                                                                                 | None | None |
|    |                                                                                                              |      |      |
| 7  | Support for attending meetings and/or travel                                                                 | None | None |
|    |                                                                                                              |      |      |
| 8  | Patents planned, issued or pending                                                                           | None | None |
|    |                                                                                                              |      |      |
| 9  | Participation on a Data Safety Monitoring Board or Advisory Board                                            | None | None |
|    |                                                                                                              |      |      |
| 10 | Leadership or fiduciary role in other board, society, committee or advocacy group, paid or unpaid            | None | None |
|    |                                                                                                              |      |      |
| 11 | Stock or stock options                                                                                       | None | None |
|    |                                                                                                              |      |      |
| 12 | Receipt of equipment, materials, drugs, medical writing, gifts or other services                             | None | None |
|    |                                                                                                              |      |      |
| 13 | Other financial or non-financial interests                                                                   | None | None |
|    |                                                                                                              |      |      |

Please place an "X" next to the following statement to indicate your agreement:

**X** I certify that I have answered every question and have not altered the wording of any of the questions on this form.

## ICMJE DISCLOSURE FORM

Date: August 7<sup>th</sup>, 2021

Your Name: Prof. Dr. Johannes Vermehren

Manuscript Title: Hepatic Sarcoidosis: Clinical Characteristics and Outcome

Manuscript number (if known): JHEPR-D-21-00154R1

In the interest of transparency, we ask you to disclose all relationships/activities/interests listed below that are related to the content of your manuscript. "Related" means any relation with for-profit or not-for-profit third parties whose interests may be affected by the content of the manuscript. Disclosure represents a commitment to transparency and does not necessarily indicate a bias. If you are in doubt about whether to list a relationship/activity/interest, it is preferable that you do so.

The following questions apply to the author's relationships/activities/interests as they relate to the current manuscript only.

The author's relationships/activities/interests should be defined broadly. For example, if your manuscript pertains to the epidemiology of hypertension, you should declare all relationships with manufacturers of antihypertensive medication, even if that medication is not mentioned in the manuscript.

In item #1 below, report all support for the work reported in this manuscript without time limit. For all other items, the time frame for disclosure is the past 36 months.

|                                                           |                                                                                                                                                                                | Name all entities with whom you have this relationship or indicate none (add rows as needed) | Specifications/Comments (e.g., if payments were made to you or to your institution) |
|-----------------------------------------------------------|--------------------------------------------------------------------------------------------------------------------------------------------------------------------------------|----------------------------------------------------------------------------------------------|-------------------------------------------------------------------------------------|
| <b>Time frame: Since the initial planning of the work</b> |                                                                                                                                                                                |                                                                                              |                                                                                     |
| 1                                                         | All support for the present manuscript (e.g., funding, provision of study materials, medical writing, article processing charges, etc.)<br><b>No time limit for this item.</b> | None                                                                                         | None                                                                                |
|                                                           |                                                                                                                                                                                |                                                                                              |                                                                                     |
|                                                           |                                                                                                                                                                                |                                                                                              |                                                                                     |
|                                                           |                                                                                                                                                                                |                                                                                              |                                                                                     |
|                                                           |                                                                                                                                                                                |                                                                                              |                                                                                     |
|                                                           |                                                                                                                                                                                |                                                                                              |                                                                                     |
|                                                           |                                                                                                                                                                                |                                                                                              |                                                                                     |
| <b>Time frame: past 36 months</b>                         |                                                                                                                                                                                |                                                                                              |                                                                                     |
| 2                                                         | Grants or contracts from any entity (if not indicated in item #1 above).                                                                                                       | None                                                                                         | None                                                                                |
|                                                           |                                                                                                                                                                                |                                                                                              |                                                                                     |
|                                                           |                                                                                                                                                                                |                                                                                              |                                                                                     |
| 3                                                         | Royalties or licenses                                                                                                                                                          | None                                                                                         | None                                                                                |
|                                                           |                                                                                                                                                                                |                                                                                              |                                                                                     |
|                                                           |                                                                                                                                                                                |                                                                                              |                                                                                     |



|    |                                                                                                              |                                                                                                                     |      |
|----|--------------------------------------------------------------------------------------------------------------|---------------------------------------------------------------------------------------------------------------------|------|
| 4  | Consulting fees                                                                                              | Consulting fees from AbbVie, Bristol-Myers Squibb, Falk, Gilead, Janssen, and Merck/MSD outside the submitted work. |      |
|    |                                                                                                              |                                                                                                                     |      |
|    |                                                                                                              |                                                                                                                     |      |
| 5  | Payment or honoraria for lectures, presentations, speakers bureaus, manuscript writing or educational events | Speaking fees from AbbVie, Bristol-Myers Squibb, Falk, Gilead, Janssen, and Merck/MSD outside the submitted work.   |      |
|    |                                                                                                              |                                                                                                                     |      |
|    |                                                                                                              |                                                                                                                     |      |
| 6  | Payment for expert testimony                                                                                 | None                                                                                                                | None |
|    |                                                                                                              |                                                                                                                     |      |
|    |                                                                                                              |                                                                                                                     |      |
| 7  | Support for attending meetings and/or travel                                                                 | None                                                                                                                | None |
|    |                                                                                                              |                                                                                                                     |      |
|    |                                                                                                              |                                                                                                                     |      |
| 8  | Patents planned, issued or pending                                                                           | None                                                                                                                | None |
|    |                                                                                                              |                                                                                                                     |      |
|    |                                                                                                              |                                                                                                                     |      |
| 9  | Participation on a Data Safety Monitoring Board or Advisory Board                                            | None                                                                                                                | None |
|    |                                                                                                              |                                                                                                                     |      |
|    |                                                                                                              |                                                                                                                     |      |
| 10 | Leadership or fiduciary role in other board, society, committee or advocacy group, paid or unpaid            | None                                                                                                                | None |
|    |                                                                                                              |                                                                                                                     |      |
|    |                                                                                                              |                                                                                                                     |      |
| 11 | Stock or stock options                                                                                       | None                                                                                                                | None |
|    |                                                                                                              |                                                                                                                     |      |
|    |                                                                                                              |                                                                                                                     |      |
| 12 | Receipt of equipment, materials, drugs, medical writing, gifts or other services                             | None                                                                                                                | None |
|    |                                                                                                              |                                                                                                                     |      |
|    |                                                                                                              |                                                                                                                     |      |
| 13 | Other financial or non-financial interests                                                                   | None                                                                                                                | None |
|    |                                                                                                              |                                                                                                                     |      |
|    |                                                                                                              |                                                                                                                     |      |

Please place an "X" next to the following statement to indicate your agreement:

**X I certify that I have answered every question and have not altered the wording of any of the questions on this form.**

## ICMJE DISCLOSURE FORM

Date: August 7<sup>th</sup>, 2021

Your Name: Prof. Dr. Gernot Rohde

Manuscript Title: Hepatic Sarcoidosis: Clinical Characteristics and Outcome

Manuscript number (if known): JHEPR-D-21-00154R1

In the interest of transparency, we ask you to disclose all relationships/activities/interests listed below that are related to the content of your manuscript. "Related" means any relation with for-profit or not-for-profit third parties whose interests may be affected by the content of the manuscript. Disclosure represents a commitment to transparency and does not necessarily indicate a bias. If you are in doubt about whether to list a relationship/activity/interest, it is preferable that you do so.

The following questions apply to the author's relationships/activities/interests as they relate to the current manuscript only.

The author's relationships/activities/interests should be defined broadly. For example, if your manuscript pertains to the epidemiology of hypertension, you should declare all relationships with manufacturers of antihypertensive medication, even if that medication is not mentioned in the manuscript.

In item #1 below, report all support for the work reported in this manuscript without time limit. For all other items, the time frame for disclosure is the past 36 months.

|                                                           |                                                                                                                                                                                | Name all entities with whom you have this relationship or indicate none (add rows as needed) | Specifications/Comments (e.g., if payments were made to you or to your institution) |
|-----------------------------------------------------------|--------------------------------------------------------------------------------------------------------------------------------------------------------------------------------|----------------------------------------------------------------------------------------------|-------------------------------------------------------------------------------------|
| <b>Time frame: Since the initial planning of the work</b> |                                                                                                                                                                                |                                                                                              |                                                                                     |
| 1                                                         | All support for the present manuscript (e.g., funding, provision of study materials, medical writing, article processing charges, etc.)<br><b>No time limit for this item.</b> | None                                                                                         | None                                                                                |
|                                                           |                                                                                                                                                                                |                                                                                              |                                                                                     |
|                                                           |                                                                                                                                                                                |                                                                                              |                                                                                     |
|                                                           |                                                                                                                                                                                |                                                                                              |                                                                                     |
|                                                           |                                                                                                                                                                                |                                                                                              |                                                                                     |
|                                                           |                                                                                                                                                                                |                                                                                              |                                                                                     |
|                                                           |                                                                                                                                                                                |                                                                                              |                                                                                     |
| <b>Time frame: past 36 months</b>                         |                                                                                                                                                                                |                                                                                              |                                                                                     |
| 2                                                         | Grants or contracts from any entity (if not indicated in item #1 above).                                                                                                       | None                                                                                         | None                                                                                |
|                                                           |                                                                                                                                                                                |                                                                                              |                                                                                     |
| 3                                                         | Royalties or licenses                                                                                                                                                          | None                                                                                         | None                                                                                |
|                                                           |                                                                                                                                                                                |                                                                                              |                                                                                     |
| 4                                                         | Consulting fees                                                                                                                                                                | None                                                                                         | None                                                                                |

|    |                                                                                                              |      |      |
|----|--------------------------------------------------------------------------------------------------------------|------|------|
|    |                                                                                                              |      |      |
|    |                                                                                                              |      |      |
| 5  | Payment or honoraria for lectures, presentations, speakers bureaus, manuscript writing or educational events | None | None |
|    |                                                                                                              |      |      |
| 6  | Payment for expert testimony                                                                                 | None | None |
|    |                                                                                                              |      |      |
| 7  | Support for attending meetings and/or travel                                                                 | None | None |
|    |                                                                                                              |      |      |
| 8  | Patents planned, issued or pending                                                                           | None | None |
|    |                                                                                                              |      |      |
| 9  | Participation on a Data Safety Monitoring Board or Advisory Board                                            | None | None |
|    |                                                                                                              |      |      |
| 10 | Leadership or fiduciary role in other board, society, committee or advocacy group, paid or unpaid            | None | None |
|    |                                                                                                              |      |      |
| 11 | Stock or stock options                                                                                       | None | None |
|    |                                                                                                              |      |      |
| 12 | Receipt of equipment, materials, drugs, medical writing, gifts or other services                             | None | None |
|    |                                                                                                              |      |      |
| 13 | Other financial or non-financial interests                                                                   | None | None |
|    |                                                                                                              |      |      |

Please place an "X" next to the following statement to indicate your agreement:

**X** I certify that I have answered every question and have not altered the wording of any of the questions on this form.

## ICMJE DISCLOSURE FORM

Date: August 7<sup>th</sup>, 2021

Your Name: Prof. Dr. Stefan Zeuzem

Manuscript Title: Hepatic Sarcoidosis: Clinical Characteristics and Outcome

Manuscript number (if known): JHEPR-D-21-00154R1

In the interest of transparency, we ask you to disclose all relationships/activities/interests listed below that are related to the content of your manuscript. "Related" means any relation with for-profit or not-for-profit third parties whose interests may be affected by the content of the manuscript. Disclosure represents a commitment to transparency and does not necessarily indicate a bias. If you are in doubt about whether to list a relationship/activity/interest, it is preferable that you do so.

The following questions apply to the author's relationships/activities/interests as they relate to the current manuscript only.

The author's relationships/activities/interests should be defined broadly. For example, if your manuscript pertains to the epidemiology of hypertension, you should declare all relationships with manufacturers of antihypertensive medication, even if that medication is not mentioned in the manuscript.

In item #1 below, report all support for the work reported in this manuscript without time limit. For all other items, the time frame for disclosure is the past 36 months.

|                                                           |                                                                                                                                                                                | Name all entities with whom you have this relationship or indicate none (add rows as needed) | Specifications/Comments (e.g., if payments were made to you or to your institution) |
|-----------------------------------------------------------|--------------------------------------------------------------------------------------------------------------------------------------------------------------------------------|----------------------------------------------------------------------------------------------|-------------------------------------------------------------------------------------|
| <b>Time frame: Since the initial planning of the work</b> |                                                                                                                                                                                |                                                                                              |                                                                                     |
| 1                                                         | All support for the present manuscript (e.g., funding, provision of study materials, medical writing, article processing charges, etc.)<br><b>No time limit for this item.</b> | None                                                                                         | None                                                                                |
|                                                           |                                                                                                                                                                                |                                                                                              |                                                                                     |
|                                                           |                                                                                                                                                                                |                                                                                              |                                                                                     |
|                                                           |                                                                                                                                                                                |                                                                                              |                                                                                     |
|                                                           |                                                                                                                                                                                |                                                                                              |                                                                                     |
|                                                           |                                                                                                                                                                                |                                                                                              |                                                                                     |
|                                                           |                                                                                                                                                                                |                                                                                              |                                                                                     |
| <b>Time frame: past 36 months</b>                         |                                                                                                                                                                                |                                                                                              |                                                                                     |
| 2                                                         | Grants or contracts from any entity (if not indicated in item #1 above).                                                                                                       | None                                                                                         | None                                                                                |
|                                                           |                                                                                                                                                                                |                                                                                              |                                                                                     |
|                                                           |                                                                                                                                                                                |                                                                                              |                                                                                     |
| 3                                                         | Royalties or licenses                                                                                                                                                          | None                                                                                         | None                                                                                |
|                                                           |                                                                                                                                                                                |                                                                                              |                                                                                     |
|                                                           |                                                                                                                                                                                |                                                                                              |                                                                                     |

|    |                                                                                                              |                                                                                                                    |      |
|----|--------------------------------------------------------------------------------------------------------------|--------------------------------------------------------------------------------------------------------------------|------|
| 4  | Consulting fees                                                                                              | Consulting fees from AbbVie, Bristol-Myers Squibb, Falk, Gilead, Janssen and Merck/MSD outside the submitted work. |      |
|    |                                                                                                              |                                                                                                                    |      |
|    |                                                                                                              |                                                                                                                    |      |
| 5  | Payment or honoraria for lectures, presentations, speakers bureaus, manuscript writing or educational events | Speaking fees from AbbVie, Bristol-Myers Squibb, Falk, Gilead, Janssen and Merck/MSD outside the submitted work.   |      |
|    |                                                                                                              |                                                                                                                    |      |
|    |                                                                                                              |                                                                                                                    |      |
| 6  | Payment for expert testimony                                                                                 | None                                                                                                               | None |
|    |                                                                                                              |                                                                                                                    |      |
|    |                                                                                                              |                                                                                                                    |      |
| 7  | Support for attending meetings and/or travel                                                                 | None                                                                                                               | None |
|    |                                                                                                              |                                                                                                                    |      |
|    |                                                                                                              |                                                                                                                    |      |
| 8  | Patents planned, issued or pending                                                                           | None                                                                                                               | None |
|    |                                                                                                              |                                                                                                                    |      |
|    |                                                                                                              |                                                                                                                    |      |
| 9  | Participation on a Data Safety Monitoring Board or Advisory Board                                            | None                                                                                                               | None |
|    |                                                                                                              |                                                                                                                    |      |
|    |                                                                                                              |                                                                                                                    |      |
| 10 | Leadership or fiduciary role in other board, society, committee or advocacy group, paid or unpaid            | None                                                                                                               | None |
|    |                                                                                                              |                                                                                                                    |      |
|    |                                                                                                              |                                                                                                                    |      |
| 11 | Stock or stock options                                                                                       | None                                                                                                               | None |
|    |                                                                                                              |                                                                                                                    |      |
|    |                                                                                                              |                                                                                                                    |      |
| 12 | Receipt of equipment, materials, drugs, medical writing, gifts or other services                             | None                                                                                                               | None |
|    |                                                                                                              |                                                                                                                    |      |
|    |                                                                                                              |                                                                                                                    |      |
| 13 | Other financial or non-financial interests                                                                   | None                                                                                                               | None |
|    |                                                                                                              |                                                                                                                    |      |
|    |                                                                                                              |                                                                                                                    |      |

**Please place an "X" next to the following statement to indicate your agreement:**

**X I certify that I have answered every question and have not altered the wording of any of the questions on this form.**

## ICMJE DISCLOSURE FORM

Date: August 7<sup>th</sup>, 2021

Your Name: Prof. Dr. Anita Pathil-Warth

Manuscript Title: Hepatic Sarcoidosis: Clinical Characteristics and Outcome

Manuscript number (if known): JHEPR-D-21-00154R1

In the interest of transparency, we ask you to disclose all relationships/activities/interests listed below that are related to the content of your manuscript. "Related" means any relation with for-profit or not-for-profit third parties whose interests may be affected by the content of the manuscript. Disclosure represents a commitment to transparency and does not necessarily indicate a bias. If you are in doubt about whether to list a relationship/activity/interest, it is preferable that you do so.

The following questions apply to the author's relationships/activities/interests as they relate to the current manuscript only.

The author's relationships/activities/interests should be defined broadly. For example, if your manuscript pertains to the epidemiology of hypertension, you should declare all relationships with manufacturers of antihypertensive medication, even if that medication is not mentioned in the manuscript.

In item #1 below, report all support for the work reported in this manuscript without time limit. For all other items, the time frame for disclosure is the past 36 months.

|                                                           |                                                                                                                                                                                | Name all entities with whom you have this relationship or indicate none (add rows as needed) | Specifications/Comments (e.g., if payments were made to you or to your institution) |
|-----------------------------------------------------------|--------------------------------------------------------------------------------------------------------------------------------------------------------------------------------|----------------------------------------------------------------------------------------------|-------------------------------------------------------------------------------------|
| <b>Time frame: Since the initial planning of the work</b> |                                                                                                                                                                                |                                                                                              |                                                                                     |
| 1                                                         | All support for the present manuscript (e.g., funding, provision of study materials, medical writing, article processing charges, etc.)<br><b>No time limit for this item.</b> | None                                                                                         | None                                                                                |
|                                                           |                                                                                                                                                                                |                                                                                              |                                                                                     |
|                                                           |                                                                                                                                                                                |                                                                                              |                                                                                     |
|                                                           |                                                                                                                                                                                |                                                                                              |                                                                                     |
|                                                           |                                                                                                                                                                                |                                                                                              |                                                                                     |
|                                                           |                                                                                                                                                                                |                                                                                              |                                                                                     |
|                                                           |                                                                                                                                                                                |                                                                                              |                                                                                     |
| <b>Time frame: past 36 months</b>                         |                                                                                                                                                                                |                                                                                              |                                                                                     |
| 2                                                         | Grants or contracts from any entity (if not indicated in item #1 above).                                                                                                       | None                                                                                         | None                                                                                |
|                                                           |                                                                                                                                                                                |                                                                                              |                                                                                     |
| 3                                                         | Royalties or licenses                                                                                                                                                          | None                                                                                         | None                                                                                |
|                                                           |                                                                                                                                                                                |                                                                                              |                                                                                     |
| 4                                                         | Consulting fees                                                                                                                                                                | None                                                                                         | None                                                                                |



|    |                                                                                                              |                                                                                |      |
|----|--------------------------------------------------------------------------------------------------------------|--------------------------------------------------------------------------------|------|
|    |                                                                                                              |                                                                                |      |
|    |                                                                                                              |                                                                                |      |
| 5  | Payment or honoraria for lectures, presentations, speakers bureaus, manuscript writing or educational events | Lecturer fees from AbbVie, BMS and Gilead Sciences outside the submitted work. | None |
|    |                                                                                                              |                                                                                |      |
| 6  | Payment for expert testimony                                                                                 | None                                                                           | None |
|    |                                                                                                              |                                                                                |      |
| 7  | Support for attending meetings and/or travel                                                                 | Travel support from AbbVie and BMS outside the submitted work.                 |      |
|    |                                                                                                              |                                                                                |      |
| 8  | Patents planned, issued or pending                                                                           | None                                                                           | None |
|    |                                                                                                              |                                                                                |      |
| 9  | Participation on a Data Safety Monitoring Board or Advisory Board                                            | None                                                                           | None |
|    |                                                                                                              |                                                                                |      |
| 10 | Leadership or fiduciary role in other board, society, committee or advocacy group, paid or unpaid            | None                                                                           | None |
|    |                                                                                                              |                                                                                |      |
| 11 | Stock or stock options                                                                                       | None                                                                           | None |
|    |                                                                                                              |                                                                                |      |
| 12 | Receipt of equipment, materials, drugs, medical writing, gifts or other services                             | None                                                                           | None |
|    |                                                                                                              |                                                                                |      |
| 13 | Other financial or non-financial interests                                                                   | None                                                                           | None |
|    |                                                                                                              |                                                                                |      |

Please place an "X" next to the following statement to indicate your agreement:

**X** I certify that I have answered every question and have not altered the wording of any of the questions on this form.
